# Supplementary material for: Synthesis and in vitro photodynamic activity of new hexadeca-carboxy phthalocyanines
Source: Royal Society of Chemistry journal article supplement (doi:10.1039/b405868b), 2004-01-01
Supplement: b405868b.pdf [file b405868b.pdf]

## Electronic Supplementary Information

**Manuscript Title:** Synthesis and *in vitro* photodynamic activity of new hexadeca-carboxy phthalocyanines

**Authors:** Chi-Fung Choi, Po-Ting Tsang, Jian-Dong Huang, Elaine Y. M. Chan, Wing-Hung Ko, Wing-Ping Fong\* and Dennis K. P. Ng\*

### Characterization Data for 3-5

**3:**  $^1\text{H}$  NMR ( $\text{CDCl}_3$ , 300 MHz)  $\delta$  8.55 (s, 2 H, ArH), 7.82 (s, 4 H, ArH), 7.32 (s, 2 H, ArH), 3.97 (s, 12 H,  $\text{CH}_3$ );  $^{13}\text{C}\{^1\text{H}\}$  NMR ( $\text{CDCl}_3$ , 75.4 MHz)  $\delta$  164.9, 154.6, 150.8, 133.1, 127.6, 124.1, 124.0, 114.4, 112.3, 52.8; HRMS (LSI)  $m/z$  545.1173 (calc. for  $\text{MH}^+$  545.1196); Anal. Calc. for  $\text{C}_{28}\text{H}_{20}\text{N}_2\text{O}_{10}$ : C, 61.77; H, 3.70; N, 5.14. Found: C, 61.56; H, 3.67; N, 5.07%.

**4:**  $^1\text{H}$  NMR ( $\text{DMSO-d}_6$ , 300 MHz)  $\delta$  8.70 (s, 8 H, Pc- $\text{H}_\alpha$ ), 7.97 (s, 8 H, ArH), 7.86 (s, 16 H, ArH), -4.30 (s, 2 H, NH);  $^{13}\text{C}\{^1\text{H}\}$  NMR ( $\text{DMSO-d}_6$ , 75.4 MHz)  $\delta$  165.9, 156.8, 149.6, 147.4, 133.3, 132.3, 125.7, 122.1, 114.9; MS (MALDI-TOF) an isotopic cluster peaking at  $m/z$  1955.18 ( $\text{M}^+$ ); UV-Vis (THF) [ $\lambda_{\text{max}}/\text{nm}$  ( $\log \epsilon$ )] 349 (4.77), 605 (4.37), 635 (4.55), 662 (4.95), 695 (4.97).

5:  $^1\text{H}$  NMR (DMSO- $d_6$ , 300 MHz)  $\delta$  12.9 (br. s, 16 H, COOH), 8.71 (s, 8 H, Pc- $\text{H}_\alpha$ ), 7.97 (s, 8 H, ArH), 7.80 (s, 16 H, ArH);  $^{13}\text{C}\{^1\text{H}\}$  NMR (DMSO- $d_6$ , 75.4 MHz)  $\delta$  165.8, 157.3, 150.3, 148.1, 135.0, 133.0, 125.1, 121.5, 115.6; MS (MALDI-TOF) an isotopic cluster peaking at  $m/z$  2018.25 ( $\text{M}^+$ ); UV-Vis (THF) [ $\lambda_{\text{max}}/\text{nm}$  ( $\log \epsilon$ )] 357 (4.95), 608 (4.57), 645 (4.55), 673 (5.36).

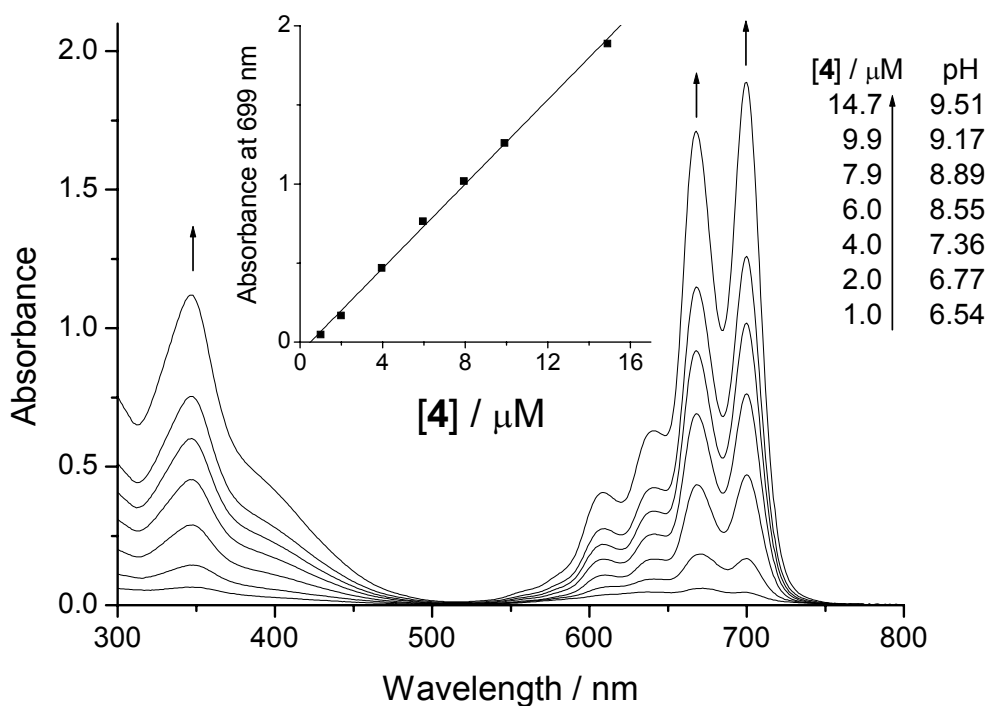

**Fig. S1** UV-Vis spectra of **4** in the presence of NaOH (about 1.3 equiv. per COOH group) in water. The inset shows the plot of the absorbance of the longest-wavelength Q band vs. the concentration of **4**.

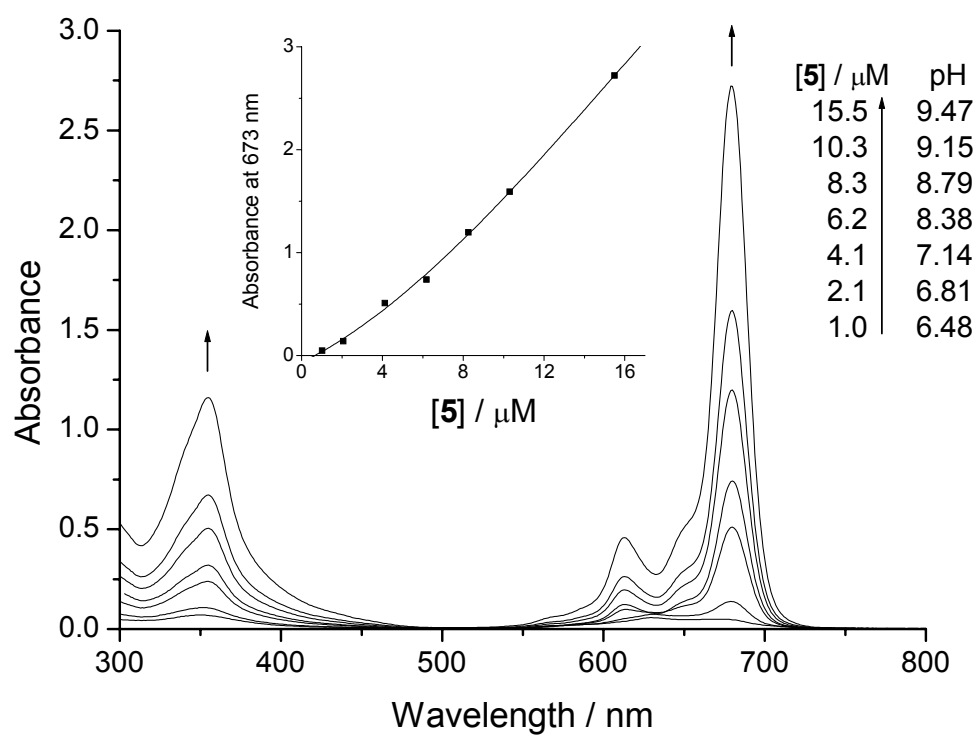

**Fig. S2** UV-Vis spectra of **5** in the presence of NaOH (about 1.3 equiv. per COOH group) in water. The inset shows the plot of the Q-band absorbance vs. the concentration of **5**.

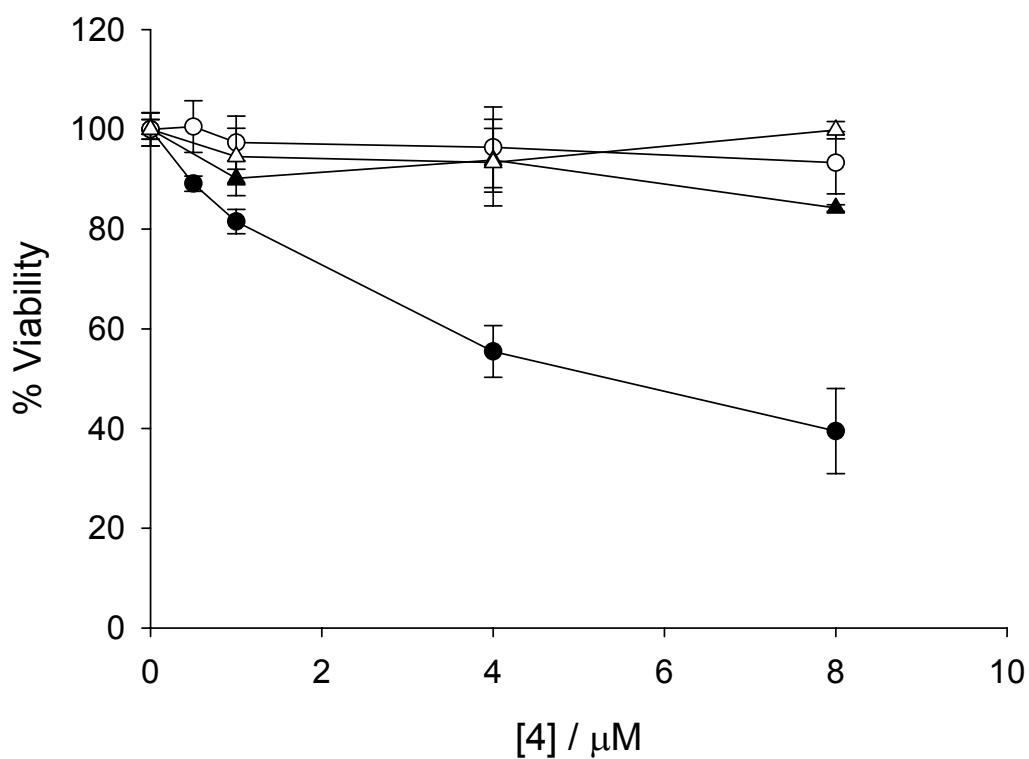

**Fig. S3** Effect of **4** on HepG2 (triangles) and J774 (circles) in the absence (open symbols) and presence (closed symbols) of light. For the latter, the cells were illuminated with a red light ( $\lambda > 610 \text{ nm}$ ,  $40 \text{ mW cm}^{-2}$ ,  $48 \text{ J cm}^{-2}$ ). Data are expressed as mean  $\pm$  SD ( $n = 3$ ).
